# Supplementary material for: Investigating Glioblastoma Multiforme Sub-Proteomes: A Computational Study of CUSA Fluid Proteomic Data
Source: MDPI journal article supplement (doi:10.3390/ijms23042058), 2022-02-12
Supplement: s1 [file s1]

# Investigating Glioblastoma Multiforme Sub-Proteomes: A Computational Study of CUSA Fluid Proteomic Data

## SUPPLEMENTARY MATERIALS

**Table S1.** List of 43 NB proteins identified in both ND- and R-GBMs pools.

| Uniprot | Protein Name                                 | ND Zones   | R Zones    |
|---------|----------------------------------------------|------------|------------|
| P02656  | Apolipoprotein C-III                         | CORE A-    | CORE A- A+ |
| P06727  | Apolipoprotein A-IV                          | CORE A- A+ | CORE A- A+ |
| P00747  | Plasminogen                                  | CORE A- A+ | CORE A- A+ |
| P02743  | Serum amyloid P-component                    | A+         | A-         |
| P27169  | Serum paraoxonase/arylesterase 1             | A+         | A+ A-      |
| P02790  | Hemopexin                                    | CORE A+ A- | CORE A+ A- |
| P07451  | Carbonic anhydrase 3                         | A-         | CORE A+ A- |
| P02750  | Leucine-rich alpha-2-glycoprotein            | CORE A+    | CORE A-    |
| P02675  | Fibrinogen beta chain                        | A+ A-      | CORE A+ A- |
| P01042  | Kininogen-1                                  | CORE A+ A- | CORE A+ A- |
| Q96KK5  | Histone H2A type 1-H                         | CORE A+ A- | CORE A+ A- |
| P59665  | Neutrophil defensin 1                        | CORE A+ A- | A+ A-      |
| P02652  | Apolipoprotein A-II                          | CORE A+ A- | CORE A+ A- |
| P02768  | Serum albumin                                | CORE A+ A- | CORE A+ A- |
| P02749  | Beta-2-glycoprotein 1                        | CORE A+ A- | CORE A+ A- |
| P02765  | Alpha-2-HS-glycoprotein                      | CORE A+ A- | CORE A+ A- |
| P04217  | Alpha-1B-glycoprotein                        | CORE A+ A- | CORE A+ A- |
| P00738  | Haptoglobin                                  | CORE A+ A- | CORE A+ A- |
| P19652  | Alpha-1-acid glycoprotein 2                  | CORE A+ A- | CORE A+ A- |
| P02671  | Fibrinogen alpha chain                       | CORE A+ A- | CORE A+ A- |
| P02549  | Spectrin alpha chain, erythrocytic 1         | CORE A+ A- | CORE A+ A- |
| Q14624  | Inter-alpha-trypsin inhibitor heavy chain H4 | A+ A-      | CORE A+ A- |
| P04004  | Vitronectin                                  | CORE A+ A- | CORE A+ A- |
| O43866  | CD5 antigen-like                             | A+ A-      | CORE A+ A- |
| P00748  | Coagulation factor XII                       | A+         | A+ A-      |
| P02760  | Protein AMBP                                 | CORE A+ A- | CORE A+ A- |
| P02679  | Fibrinogen gamma chain                       | A+ A-      | CORE A+ A- |
| P04908  | Histone H2A type 1-B/E                       | A-         | CORE       |
| P43652  | Afamin                                       | CORE A+ A- | CORE A+ A- |
| P04114  | Apolipoprotein B-100                         | A+ A-      | CORE A+ A- |
| P04264  | Keratin, type II cytoskeletal 1              | CORE A+    | A-         |
| P02774  | Vitamin D-binding protein                    | CORE A+ A- | CORE A+ A- |
| P19827  | Inter-alpha-trypsin inhibitor heavy chain H1 | A+ A-      | CORE A+ A- |
| P04003  | C4b-binding protein alpha chain              | A+ A-      | CORE A+ A- |
| P62805  | Histone H4                                   | A+         | A+         |
| P68032  | Actin, alpha cardiac muscle 1                | CORE A-    | CORE A+ A- |
| P00734  | Prothrombin                                  | CORE A+ A- | CORE A+ A- |
| P01008  | Antithrombin-III                             | CORE A+ A- | CORE A+ A- |
| P23527  | Histone H2B type 1-O                         | CORE A-    | CORE       |
| P02647  | Apolipoprotein A-I                           | CORE A+ A- | CORE A+ A- |
| P04196  | Histidine-rich glycoprotein                  | CORE A+ A- | CORE A+ A- |
| P02763  | Alpha-1-acid glycoprotein 1                  | CORE A+ A- | CORE A+ A- |
| P13671  | Complement component C6                      | A-         | A+         |

**Table S2.** List of the 128 common ND- and R-GBMs Cancer Related proteins.

| Uniprot | Protein Name                                         | ND Zones   | R Zones    |
|---------|------------------------------------------------------|------------|------------|
| P09211  | Glutathione S-transferase                            | A+         | A+ A-      |
| P02656  | Apolipoprotein C-III                                 | A- CORE    | CORE A+ A- |
| P27169  | Serum paraoxonase/arylesterase                       | A+         | A+ A-      |
| P60201  | Myelin proteolipid protein                           | A+         | A+ A-      |
| P02675  | Fibrinogen beta chain                                | A+ A-      | CORE A+ A- |
| P53396  | ATP-citrate synthase                                 | A+         | A+ A-      |
| P02794  | Ferritin heavy chain                                 | A+ A-      | CORE A+ A- |
| P13639  | Elongation factor 2                                  | A+         | A+ A-      |
| P16949  | Stathmin                                             | A- CORE    | CORE A+ A- |
| P14174  | Macrophage migration inhibitory factor               | A-         | CORE A+    |
| P14618  | Pyruvate kinase PKM                                  | CORE A+ A- | CORE A+ A- |
| P04004  | Vitronectin                                          | CORE A+ A- | CORE A+ A- |
| P68104  | Elongation factor 1-alpha 1                          | CORE A+ A- | CORE A+ A- |
| P21266  | Glutathione S-transferase Mu 3                       | A+         | A-         |
| P06753  | Tropomyosin alpha-3 chain                            | A+ A-      | CORE A+ A- |
| P06748  | Nucleophosmin                                        | CORE A+ A- | CORE A-    |
| P61088  | Ubiquitin-conjugating enzyme E2 N                    | A+         | A- A+      |
| P54725  | UV excision repair protein RAD23 homolog A           | A+         | A-         |
| Q00610  | Clathrin heavy chain 1                               | A+         | A- A+      |
| P49418  | Amphiphysin                                          | A+         | A- A+      |
| P00450  | Ceruloplasmin                                        | CORE A+ A- | CORE A+ A- |
| P02751  | Fibronectin                                          | CORE A+ A- | CORE A+ A- |
| P08238  | Heat shock protein HSP 90-beta                       | CORE A+ A- | CORE A+ A- |
| P61604  | 10 kDa heat shock protein, mitochondrial             | CORE A+ A- | CORE A+ A- |
| P02647  | Apolipoprotein A-I                                   | CORE A+ A- | CORE A+ A- |
| P16070  | CD44 antigen                                         | CORE       | CORE       |
| Q01469  | Fatty acid-binding protein, epidermal                | CORE A+ A- | CORE A+    |
| P04075  | Fructose-bisphosphate aldolase A                     | CORE A+ A- | CORE A+ A- |
| Q15149  | Plectin                                              | A+ A-      | CORE A+ A- |
| P60174  | Triosephosphate isomerase                            | CORE A+ A- | CORE A+ A- |
| P05023  | Sodium/potassium-transporting ATPase subunit alpha-1 | A+ A-      | CORE A-    |
| P32119  | Peroxiredoxin-2                                      | CORE A+ A- | CORE A+ A- |
| P31939  | Bifunctional purine biosynthesis protein PURH        | A+         | A-         |
| P11142  | Heat shock cognate 71 kDa protein                    | CORE A+ A- | CORE A+ A- |
| P22626  | Heterogeneous nuclear ribonucleoproteins A2/B1       | CORE A+ A- | CORE A+ A- |
| P15311  | Ezrin                                                | A+ A-      | CORE       |
| P02649  | Apolipoprotein E                                     | CORE A+ A- | CORE A+ A- |
| P00738  | Haptoglobin                                          | CORE A+ A- | CORE A+ A- |
| P02792  | Ferritin light chain                                 | A+ A-      | CORE A+ A- |
| P01034  | Cystatin-C                                           | A+ A-      | A+ A-      |
| P04179  | Superoxide dismutase [Mn], mitochondrial             | A+         | CORE A+ A- |
| P48735  | Isocitrate dehydrogenase [NADP], mitochondrial       | A+         | A+ A-      |
| P01023  | Alpha-2-macroglobulin                                | CORE A+ A- | CORE A+ A- |
| P06733  | Alpha-enolase                                        | CORE A+ A- | CORE A+ A- |
| P02671  | Fibrinogen alpha chain                               | CORE A+ A- | CORE A+ A- |
| P09972  | Fructose-bisphosphate aldolase C                     | CORE A+ A- | CORE A+ A- |
| P02654  | Apolipoprotein C-I                                   | A+         | A+ A-      |
| P00338  | L-lactate dehydrogenase A chain                      | A+         | CORE A+ A- |
| P09104  | Gamma-enolase                                        | A+ A-      | CORE A+ A- |
| P10412  | Histone H1.4                                         | CORE       | CORE       |
| P04040  | Catalase                                             | CORE A+ A- | CORE A+ A- |

|        |                                                                                   |            |            |
|--------|-----------------------------------------------------------------------------------|------------|------------|
| P00441 | Superoxide dismutase [Cu-Zn]                                                      | CORE A+ A- | CORE A+ A- |
| P25311 | Zinc-alpha-2-glycoprotein                                                         | CORE A+ A- | CORE A+ A- |
| P06396 | Gelsolin                                                                          | A+ A-      | CORE A+ A- |
| P62258 | 14-3-3 protein epsilon                                                            | A+         | A+ A-      |
| P07339 | Cathepsin D                                                                       | A+         | A-         |
| P06744 | Glucose-6-phosphate isomerase                                                     | A+         | CORE A+ A- |
| P02787 | Serotransferrin                                                                   | CORE A+ A- | CORE A+ A- |
| P06702 | Protein S100-A9                                                                   | A+ A-      | CORE A+ A- |
| P17174 | Aspartate aminotransferase, cytoplasmic                                           | A+ A-      | A+ A-      |
| P14625 | Endoplasmin                                                                       | A+         | A-         |
| P10909 | Clusterin                                                                         | CORE A+ A- | CORE A+ A- |
| P62805 | Histone H4                                                                        | A+         | A+         |
| P10809 | 60 kDa heat shock protein, mitochondrial                                          | CORE A+ A- | CORE A+ A- |
| P22314 | Ubiquitin-like modifier-activating enzyme 1                                       | A+         | A+ A-      |
| P04080 | Cystatin-B                                                                        | A+         | CORE A+ A- |
| P13671 | Complement component C6                                                           | A-         | A+         |
| Q15019 | Septin-2                                                                          | A+ A-      | CORE A+ A- |
| P00747 | Plasminogen                                                                       | CORE A+ A- | CORE A+ A- |
| Q92597 | Protein NDRG1                                                                     | A+         | CORE A-    |
| P34932 | Heat shock 70 kDa protein 4                                                       | A+         | A+ A-      |
| P02766 | Transthyretin                                                                     | CORE A+ A- | CORE A+ A- |
| P08603 | Complement factor H                                                               | CORE A+ A- | CORE A+ A- |
| P10451 | Osteopontin                                                                       | CORE       | A-         |
| P01011 | Alpha-1-antichymotrypsin                                                          | A+ A-      | A+ A-      |
| P43003 | Excitatory amino acid transporter 1                                               | A+ A-      | CORE A-    |
| P35579 | Myosin-9                                                                          | A+ A-      | CORE A+ A- |
| P02768 | Serum albumin                                                                     | CORE A+ A- | CORE A+ A- |
| P04083 | Annexin A1                                                                        | A+         | CORE A+ A- |
| Q14624 | Inter-alpha-trypsin inhibitor heavy chain H4                                      | A+ A-      | CORE A+ A- |
| Q04760 | Lactoylglutathione lyase                                                          | A+         | CORE A+ A- |
| O00299 | Chloride intracellular channel protein 1                                          | A+         | A+         |
| P02511 | Alpha-crystallin B chain                                                          | CORE A+ A- | CORE A+ A- |
| P24821 | Tenascin                                                                          | A+ CORE    | CORE       |
| P36955 | Pigment epithelium-derived factor                                                 | A+         | A-         |
| P01009 | Alpha-1-antitrypsin                                                               | CORE A+ A- | CORE A+ A- |
| P30153 | Serine/threonine-protein phosphatase 2A 65 kDa regulatory subunit A alpha isoform | A+         | A-         |
| P02679 | Fibrinogen gamma chain                                                            | A+ A-      | CORE A+ A- |
| P02753 | Retinol-binding protein 4                                                         | A+         | A+ A-      |
| P02788 | Lactotransferrin                                                                  | CORE A+ A- | CORE A+ A- |
| P20810 | Calpastatin                                                                       | A-         | A+         |
| P21926 | CD9 antigen                                                                       | A+         | A+         |
| Q13526 | Peptidyl-prolyl cis-trans isomerase NIMA-interacting 1                            | CORE A-    | CORE A+ A- |
| P02763 | Alpha-1-acid glycoprotein 1                                                       | CORE A+ A- | CORE A+ A- |
| Q14847 | LIM and SH3 domain protein 1                                                      | A+         | CORE       |
| P27797 | Calreticulin                                                                      | A+         | A-         |
| P62873 | Guanine nucleotide-binding protein G(I)/G(S)/G(T) subunit beta-1                  | A+ A-      | CORE A+ A- |
| P67936 | Tropomyosin alpha-4 chain                                                         | CORE A+ A- | CORE A+ A- |
| Q71U36 | Tubulin alpha-1A chain                                                            | A+ A-      | A+ A-      |
| P59665 | Neutrophil defensin 1                                                             | CORE A+ A- | A+ A-      |
| Q01105 | Protein SET                                                                       | A+         | A-         |
| P07108 | Acyl-CoA-binding protein                                                          | A+         | A-         |
| P02652 | Apolipoprotein A-II                                                               | CORE A+ A- | CORE A+ A- |

|        |                                                                   |            |            |
|--------|-------------------------------------------------------------------|------------|------------|
| Q08380 | Galectin-3-binding protein                                        | A+         | A+         |
| P02765 | Alpha-2-HS-glycoprotein                                           | CORE A+ A- | CORE A+ A- |
| P09493 | Tropomyosin alpha-1 chain                                         | A-         | CORE       |
| P04792 | Heat shock protein beta-1                                         | CORE A+ A- | CORE A+ A- |
| P43490 | Nicotinamide phosphoribosyltransferase                            | A+         | CORE A+ A- |
| P05090 | Apolipoprotein D                                                  | CORE A+ A- | CORE A+ A- |
| P05164 | Myeloperoxidase                                                   | A+ A-      | CORE       |
| P40925 | Malate dehydrogenase, cytoplasmic                                 | CORE A+ A- | CORE A+ A- |
| P15531 | Nucleoside diphosphate kinase A                                   | A+         | A+ A-      |
| P00505 | Aspartate aminotransferase, mitochondrial                         | A+         | A+ A-      |
| P07900 | Heat shock protein HSP 90-alpha                                   | CORE A+ A- | CORE A+ A- |
| Q16658 | Fascin                                                            | A+ A-      | CORE A+ A- |
| Q04917 | 14-3-3 protein eta                                                | A+         | CORE A+ A- |
| P35637 | RNA-binding protein FUS                                           | A+         | CORE       |
| P63241 | Eukaryotic translation initiation factor 5A-1                     | A+         | CORE A+ A- |
| P00734 | Prothrombin                                                       | CORE A+ A- | CORE A+ A- |
| P11166 | Solute carrier family 2, facilitated glucose transporter member 1 | A+ A-      | A+         |
| P07954 | Fumarate hydratase, mitochondrial                                 | A+         | A+         |
| P31946 | 14-3-3 protein beta/alpha                                         | CORE A+ A- | CORE A+ A- |
| P05109 | Protein S100-A8                                                   | A-         | A+ A-      |
| P13591 | Neural cell adhesion molecule 1                                   | A+ A-      | A+ A-      |
| P12277 | Creatine kinase B-type                                            | CORE A+ A- | CORE A+ A- |
| P26038 | Moesin                                                            | CORE A+ A- | CORE A+ A- |
| P61586 | Transforming protein RhoA                                         | A+         | A+ A-      |
| P22392 | Nucleoside diphosphate kinase B                                   | A+ A-      | A-         |

**Table S3.** List of the 40 EVs proteins common to ND- and R-GBMs pools.

| Uniprot | Protein name                                        | ND zones   | R zones    |
|---------|-----------------------------------------------------|------------|------------|
| P23471  | Receptor-type tyrosine-protein phosphatase zeta     | A+ A-      | CORE A+ A- |
| P06727  | Apolipoprotein A-IV                                 | CORE A+ A- | CORE A+ A- |
| P02750  | Leucine-rich alpha-2-glycoprotein                   | CORE A+    | CORE A-    |
| P60174  | Triosephosphate isomerase                           | CORE A+ A- | CORE A+ A- |
| P50897  | Palmitoyl-protein thioesterase 1                    | A+         | A+ A-      |
| P04406  | Glyceraldehyde-3-phosphate dehydrogenase            | CORE A+ A- | CORE A+ A- |
| P62328  | Thymosin beta-4                                     | A+ A-      | CORE A+ A- |
| P0DMV8  | Heat shock 70 kDa protein 1A                        | A+ A-      | CORE A+ A- |
| P07998  | Ribonuclease pancreatic                             | A-         | CORE A+ A- |
| Q13813  | Spectrin alpha chain, non-erythrocytic 1            | CORE A+ A- | CORE A+ A- |
| P38606  | V-type proton ATPase catalytic subunit A            | A+         | A+ A-      |
| P21281  | V-type proton ATPase subunit B                      | A+         | CORE A+ A- |
| P08603  | Complement factor H                                 | CORE A+ A- | CORE A+ A- |
| P11142  | Heat shock cognate 71 kDa protein                   | CORE A+ A- | CORE A+ A- |
| P30043  | Flavin reductase (NADPH)                            | A+ A-      | CORE A+ A- |
| P21796  | Voltage-dependent anion-selective channel protein 1 | A+         | A+ A-      |
| P02649  | Apolipoprotein E                                    | CORE A+ A- | CORE A+ A- |
| P61266  | Syntaxin-1B                                         | A+         | A+ A-      |
| P00738  | Haptoglobin                                         | CORE A+ A- | CORE A+ A- |
| P01034  | Cystatin-C                                          | A+ A-      | A+ A-      |
| P00751  | Complement factor B                                 | CORE A+ A- | CORE A+ A- |
| P13611  | Versican core protein                               | CORE A+ A- | CORE A+ A- |
| P19652  | Alpha-1-acid glycoprotein 2                         | CORE A+ A- | CORE A+ A- |

|        |                                              |            |            |
|--------|----------------------------------------------|------------|------------|
| P05164 | Myeloperoxidase                              | A+ A-      | CORE       |
| Q14624 | Inter-alpha-trypsin inhibitor heavy chain H4 | A+ A-      | CORE A+ A- |
| P09972 | Fructose-bisphosphate aldolase C             | CORE A+ A- | CORE A+ A- |
| P00338 | L-lactate dehydrogenase A chain              | A+         | CORE A+ A- |
| P04004 | Vitronectin                                  | CORE A+ A- | CORE A+ A- |
| P04040 | Catalase                                     | CORE A+ A- | CORE A+ A- |
| P0DP23 | Calmodulin-1                                 | A+ A-      | CORE A+ A- |
| P02760 | Protein AMBP                                 | CORE A+ A- | CORE A+ A- |
| P01009 | Alpha-1-antitrypsin                          | CORE A+ A- | CORE A+ A- |
| Q00610 | Clathrin heavy chain 1                       | A+         | A+ A-      |
| P60880 | Synaptosomal-associated protein 25           | A+ A-      | CORE A+ A- |
| P25311 | Zinc-alpha-2-glycoprotein                    | CORE A+ A- | CORE A+ A- |
| P04114 | Apolipoprotein B-100                         | A+ A-      | CORE A+ A- |
| P19827 | Inter-alpha-trypsin inhibitor heavy chain H1 | A+ A-      | CORE A+ A- |
| P07602 | Prosaposin                                   | A+         | CORE A+ A- |
| P02763 | Alpha-1-acid glycoprotein 1                  | CORE A+ A- | CORE A+ A- |
| P02647 | Apolipoprotein A-I                           | CORE A+ A- | CORE A+ A- |

**Table S4.** List of the six common proteins to all three sub proteomes.

| Uniprot | Protein Name                                 | ND Zones   | R Zones    |
|---------|----------------------------------------------|------------|------------|
| P04004  | Vitronectin                                  | CORE A+ A- | CORE A+ A- |
| P02647  | Apolipoprotein A-I                           | CORE A+ A- | CORE A+ A- |
| P00738  | Haptoglobin                                  | CORE A+ A- | CORE A+ A- |
| Q03591  | Complement factor H-related protein 1        |            | CORE A+ A- |
| Q14624  | Inter-alpha-trypsin inhibitor heavy chain H4 | A+ A-      | CORE A+ A- |
| P02763  | Alpha-1-acid glycoprotein 1                  | CORE A+ A- | CORE A+ A- |

**Table S5.** List of proteins that are both Cancer Related and Non Brain.

| Uniprot | Protein Name                     | ND Zones   | R Zones    |
|---------|----------------------------------|------------|------------|
| P02656  | Apolipoprotein C-III             | CORE A-    | CORE A- A+ |
| P27169  | Serum paraoxonase/arylesterase 1 | A+         | A+ A-      |
| P02675  | Fibrinogen beta chain            | A+ A-      | CORE A+ A- |
| P02671  | Fibrinogen alpha chain           | CORE A+ A- | CORE A+ A- |
| P62805  | Histone H4                       | A+         | A+         |
| P13671  | Complement component C6          | A-         | A+         |
| P00747  | Plasminogen                      | CORE A- A+ | CORE A- A+ |
| P02768  | Serum albumin                    | CORE A+ A- | CORE A+ A- |
| P02679  | Fibrinogen gamma chain           | A+ A-      | CORE A+ A- |
| P59665  | Neutrophil defensin 1            | CORE A+ A- | A+ A-      |
| P02652  | Apolipoprotein A-II              | CORE A+ A- | CORE A+ A- |
| P02765  | Alpha-2-HS-glycoprotein          | CORE A+ A- | CORE A+ A- |
| P00734  | Prothrombin                      | CORE A+ A- | CORE A+ A- |

**Table S6.** List of elements that are both Cancer Related and Extracellular Vesicles proteins.

| Uniprot | Protein Name                                 | ND Zones   | R Zones    |
|---------|----------------------------------------------|------------|------------|
| P31751  | RAC-beta serine/threonine-protein kinase     |            | A-         |
| Q00610  | Clathrin heavy chain 1                       | A+         | A+ A-      |
| P60174  | Triosephosphate isomerase                    | CORE A+ A- | CORE A+ A- |
| P67809  | Nuclease-sensitive element-binding protein 1 |            | CORE       |
| P11142  | Heat shock cognate 71 kDa protein            | CORE A+ A- | CORE A+ A- |

|        |                                     |            |            |
|--------|-------------------------------------|------------|------------|
| P02649 | Apolipoprotein E                    | CORE A+ A- | CORE A+ A- |
| P13987 | CD59 glycoprotein                   | CORE       |            |
| P01034 | Cystatin-C                          | A+ A-      | A+ A-      |
| P09972 | Fructose-bisphosphate aldolase C    | CORE A+ A- | CORE A+ A- |
| P00338 | L-lactate dehydrogenase A chain     | A+         | CORE A+ A- |
| P04040 | Catalase                            | CORE A+ A- | CORE A+ A- |
| P25311 | Zinc-alpha-2-glycoprotein           | CORE A+ A- | CORE A+ A- |
| P54652 | Heat shock-related 70 kDa protein 2 |            | A+ A-      |
| P08603 | Complement factor H                 | CORE A+ A- | CORE A+ A- |
| P36222 | Chitinase-3-like protein 1          | A+         |            |
| P01009 | Alpha-1-antitrypsin                 | CORE A+ A- | CORE A+ A- |
| P05164 | Myeloperoxidase                     | A+ A-      | CORE       |

**Table S7.** List of elements that are both Extracellular Vesicles proteins and Not detected in Brain.

| Uniprot | Protein Name                                 | ND Zones   | R Zones    |
|---------|----------------------------------------------|------------|------------|
| P19827  | Inter-alpha-trypsin inhibitor heavy chain H1 | A+ A-      | CORE A+ A- |
| P06727  | Apolipoprotein A-IV                          | CORE A+ A- | CORE A+ A- |
| P02750  | Leucine-rich alpha-2-glycoprotein            | CORE A+    | CORE A-    |
| P19652  | Alpha-1-acid glycoprotein 2                  | CORE A+ A- | CORE A+ A- |
| P02760  | Protein AMBP                                 | CORE A+ A- | CORE A+ A- |
| P04114  | Apolipoprotein B-100                         | A+ A-      | CORE A+ A- |
